# Supplementary material for: No Silver Bullet for Digital Soil Mapping: Country-specific Soil Organic Carbon Estimates across Latin America
Source: Copernicus journal article supplement (doi:10.5194/soil-2017-40), 2018-01-25
Supplement: Supplementary file 1 [file soil-2017-40-supplement.pdf]

## Supplement for manuscript soil-2017-40

*M. Guevara et al: No Silver Bullet on Digital Soil Mapping: Country-specific Soil Organic Carbon Estimates across Latin America*

### Supplementary Figure S1

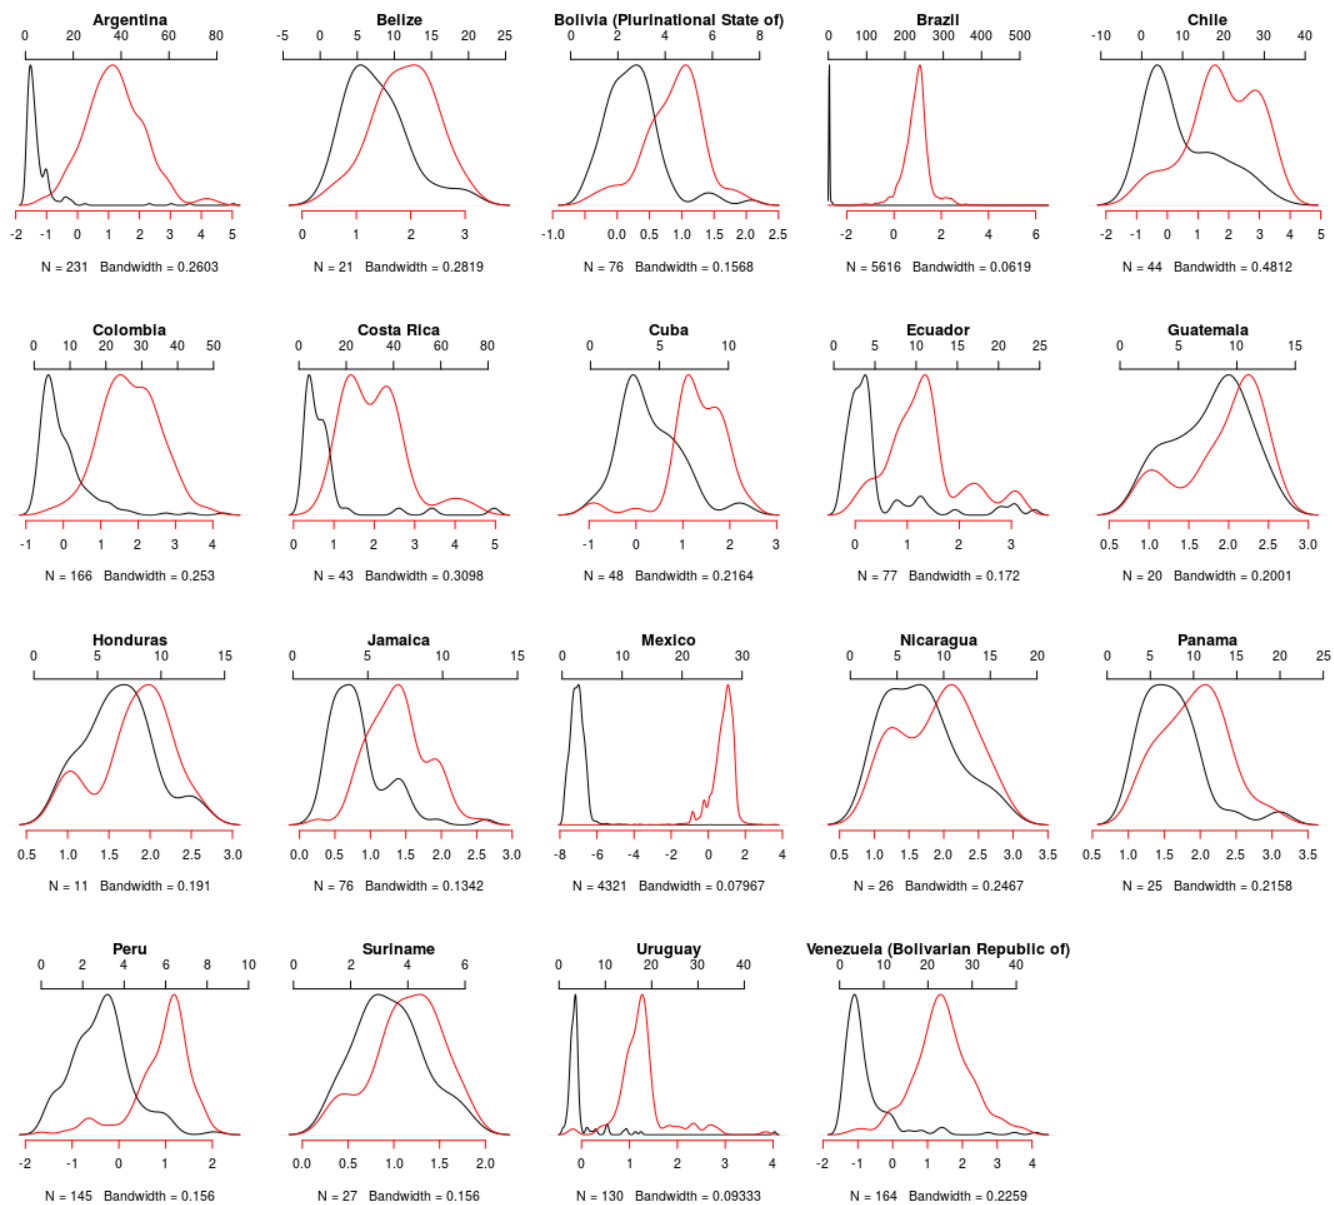

**Figure S1.** Probability distribution functions for the estimated SOC values (in kg.m<sup>-2</sup>) before (black lines) and after (red lines) the log transformation across the 19 analyzed countries.
